# Supplementary material for: Bland–Altman agreement analysis between CT predicted and surgical peritoneal cancer index in pseudomyxoma peritonei of appendiceal origin
Source: Springer Nature journal article supplement (doi:10.1038/s41598-023-48975-9), 2023-12-06
Supplement: MOESM3 [file 41598_2023_48975_MOESM3_ESM.pdf]

Supplementary Figure 1. The approximate normal distribution of differences points between total CT-PCI and surgical PCI.

Supplementary Figure 2. The approximate normal distribution of differences points between selected CT-PCI and surgical PCI.
